# Supplementary material for: A simple paper-based approach for arsenic determination in water using hydride generation coupled with mercaptosuccinic-acid capped CdTe quantum dots
Source: Royal Society of Chemistry journal article supplement (doi:10.1039/d0ay00273a), 2020-01-01
Supplement: d0ay00273a1.pdf [file d0ay00273a1.pdf]

**Supplementary material**

**A simple paper-based approach for arsenic determination in water using hydride generation coupled  
with mercaptosuccinic-acid capped CdTe quantum dots**

Oraphan Thepmanee,<sup>a</sup> Kanlaya Prapainop,<sup>b,c</sup> Obnithi Noppha,<sup>c</sup> Nuanlaor Rattanawimanwong,<sup>a</sup> Weena  
Siangproh,<sup>a</sup> Orawon Chailapakul,<sup>d</sup> Kriangsak Songsrirote<sup>\*a</sup>

<sup>a</sup> Department of Chemistry, Faculty of Science, Srinakharinwirot University, Sukhumvit 23, Wattana, Bangkok  
10110, Thailand

<sup>b</sup> Department of Biochemistry, Faculty of Science, Mahidol University, Rama VI Road, Ratchathewi, Bangkok  
10400, Thailand

<sup>c</sup> School of Materials Science and Innovation, Faculty of Science, Mahidol University, Rama VI Road,  
Ratchathewi, Bangkok 10400, Thailand

<sup>d</sup> Electrochemistry and Optical Spectroscopy Research Unit, Department of Chemistry, Faculty of Science,  
Chulalongkorn University, 254 Phayathai Road, Pathumwan, Bangkok 10330, Thailand

\*Corresponding authors: Kriangsak Songsrirote. Tel: +66(0)98-2690388 Fax: +66(0)22-600128. E-mail:  
kriangsaks@g.swu.ac.th

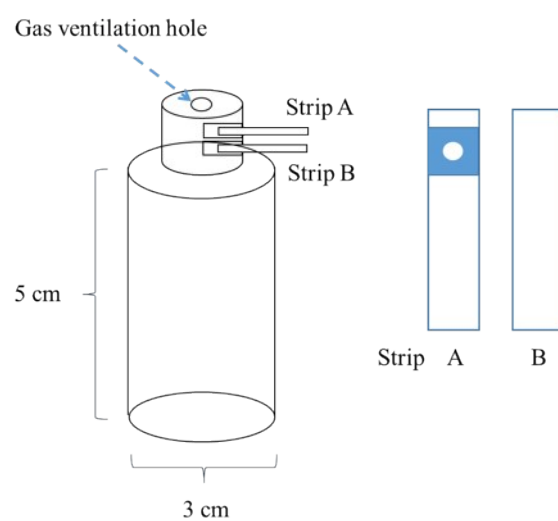

**Figure S1.** Reaction bottle and paper strips for arsenic determination.

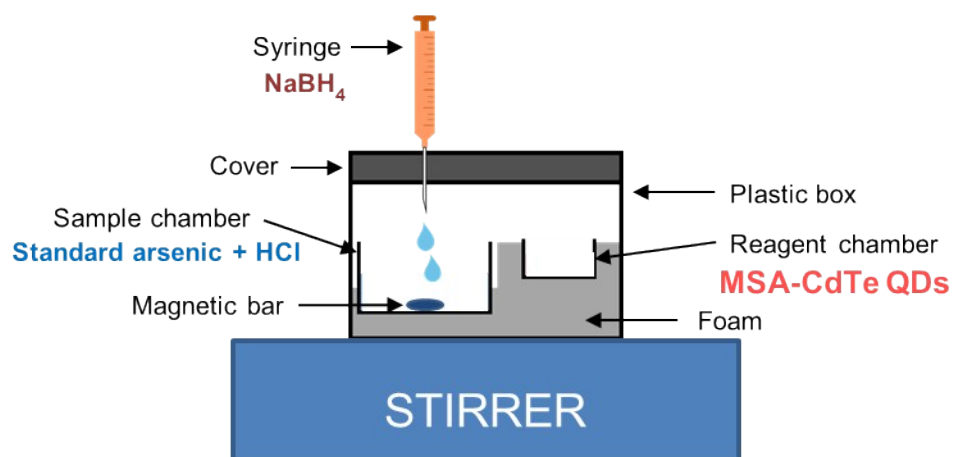

**Figure S2.** Diagram of gas diffusion system for arsine gas generation and diffusion to react with MSA-CdTe QDs.

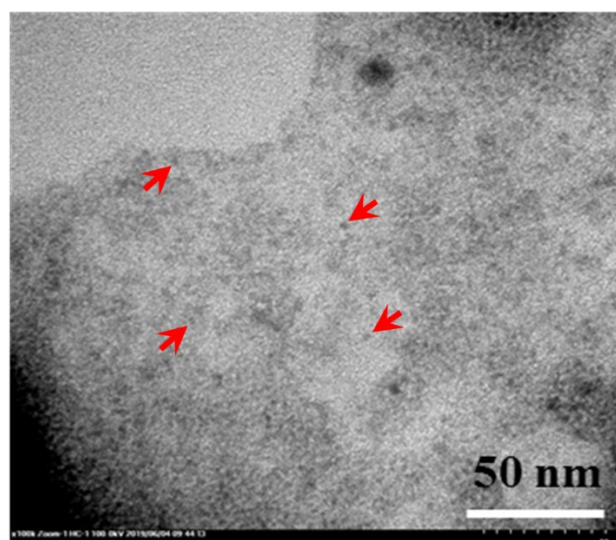

**Figure S3.** TEM image of MSA-CdTe QDs.

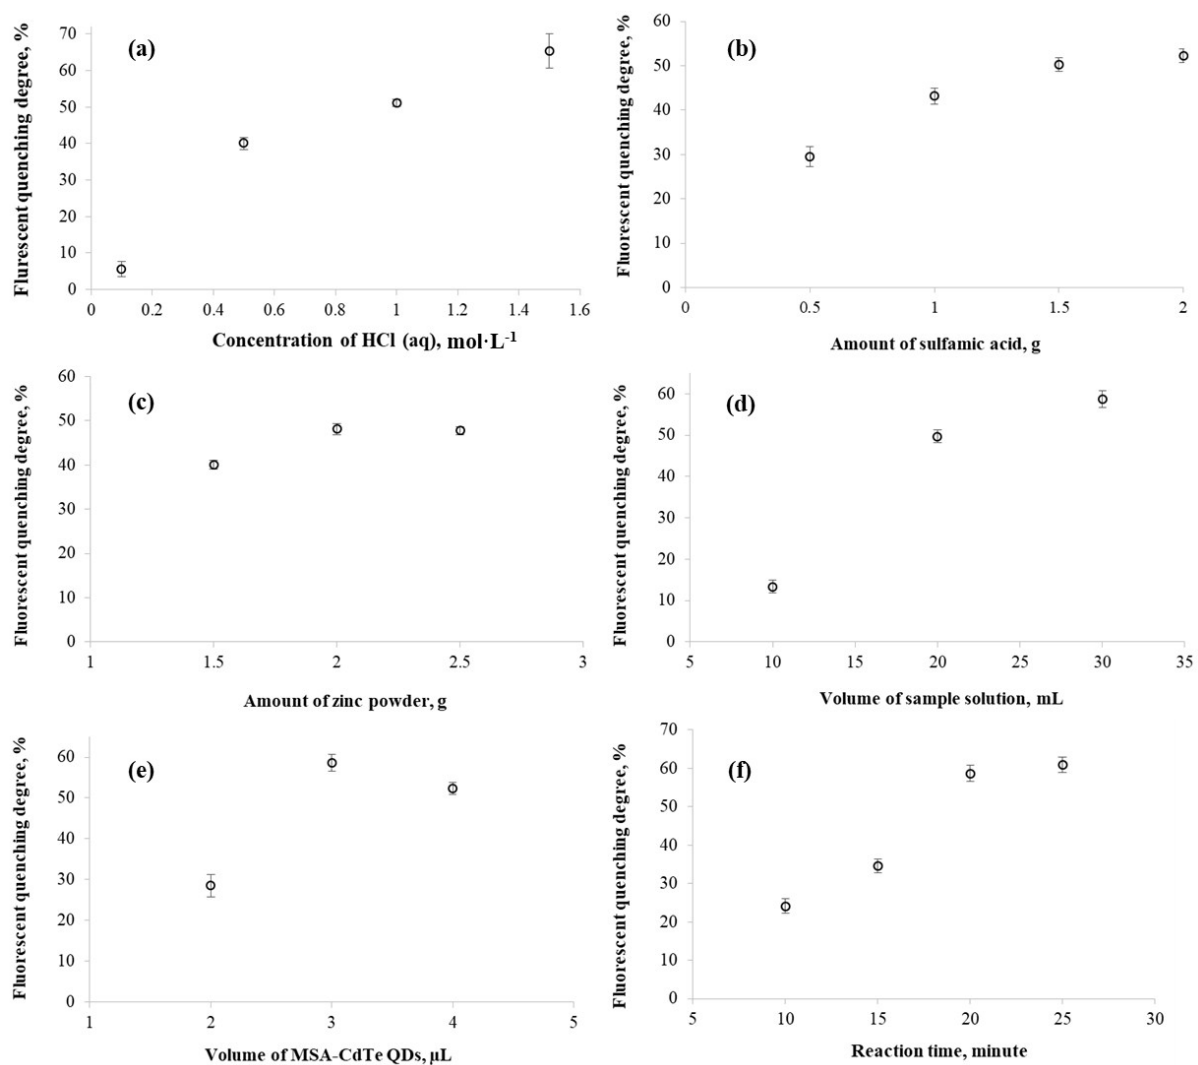

**Figure S4.** Fluorescent quenching degree of MSA-CdTe QDs with different (a) concentrations of HCl (aq), (b) amounts of sulfamic acid, (c) amounts of zinc powder, (d) volumes of sample solution, (e) volumes of MSA-CdTe QDs, and (f) reaction time for reaction of arsenic hydride generation.

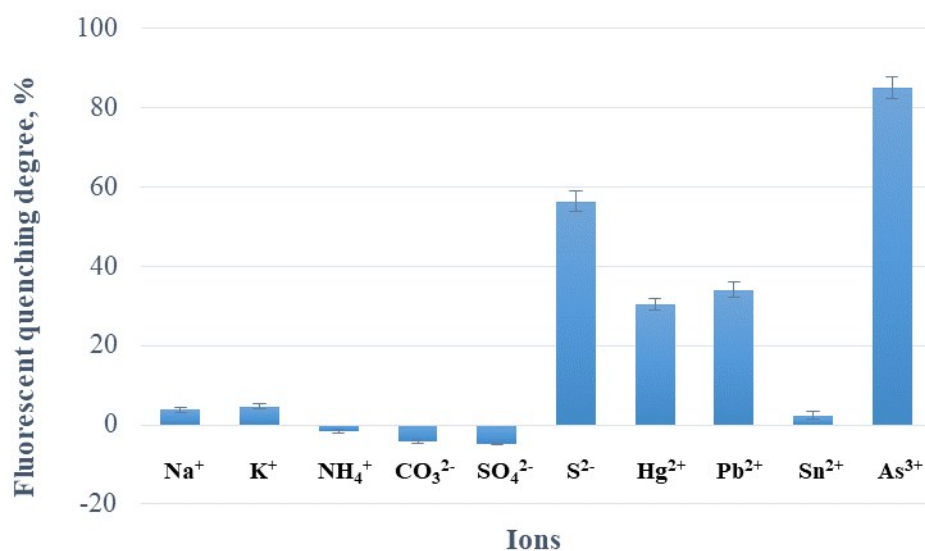

**Figure S5.** Effect of different ions in solution on fluorescent quenching of MSA-CdTe QDs.

**Table S1.** The studied parameters for arsenic detection based on the developed approach.

| Parameters                | Conditions                                                        |
|---------------------------|-------------------------------------------------------------------|
| Type and amount of acid   | 1.0 mL of 0.5, 1.0, and 1.5 mol·L <sup>-1</sup> HCl ( <i>aq</i> ) |
|                           | 0.5, 1.0, 1.5, and 2.0 g of sulfamic acid ( <i>s</i> )            |
| Amount of zinc powder     | 1.5, 2.0, 2.5 g                                                   |
| Volume of sample solution | 10.0, 20.0, and 30.0 mL                                           |
| Volume of MSA-CdTe CDs    | 2.0, 3.0, and 4.0 mL                                              |
| Reaction time             | 10.0, 15.0, 20.0, and 25.0 min                                    |
